# Supplementary material
Source: PubMed Central journal article supplement (PMC3026963)
Supplement: NIHMS34072-supplement-01.pdf [file NIHMS34072-supplement-01.pdf]

## SUPPLEMENTARY ONLINE DATA

# Cystic fibrosis transmembrane regulator fragments with the Phe<sup>508</sup> deletion exert a dual allosteric control over the master kinase CK2

Mario A. PAGANO\*†, Oriano MARIN\*†, Giorgio COZZA\*, Stefania SARNO\*†, Flavio MEGGIO\*, Kate J. TREHARNE‡, Anil MEHTA‡ and Lorenzo A. PINNA\*†<sup>1</sup>

\*Department of Biological Chemistry and CNR Institute of Neurosciences, University of Padova, viale G. Colombo 3, 35131 Padova, Italy, †Venetian Institute for Molecular Medicine (VIMM), via Orus 2, 35129 Padova, Italy, and ‡Division of Medical Sciences, Centre for Cardiovascular and Lung Biology, University of Dundee, Ninewells Hospital, Dundee DD1 9SY, Scotland, U.K.

**Table S1** Binding constants of  $\beta(181-203)$  peptide for the CK2 $\alpha$  catalytic subunit

Injections of 35  $\mu$ l of  $\beta$ -peptide solutions (10–200  $\mu$ M) were performed over a sensor chip containing 1600 RU (relative units) of immobilized CK2 $\alpha$  at a flow rate of 10  $\mu$ l/min. The Langmuir 1:1 model was used to fit kinetic data. Association rate ( $k_a$ ), dissociation rate ( $k_d$ ) and dissociation constant ( $K_D=k_d/k_a$ ) are reported.

| Analyte          | $k_a$ ( $M^{-1} \cdot s^{-1}$ ) | $k_d$ ( $s^{-1}$ ) $\times 10^{-3}$ | $K_D$ ( $\mu$ M) |
|------------------|---------------------------------|-------------------------------------|------------------|
| $\beta(181-203)$ | 406                             | 3.43                                | 8.45             |

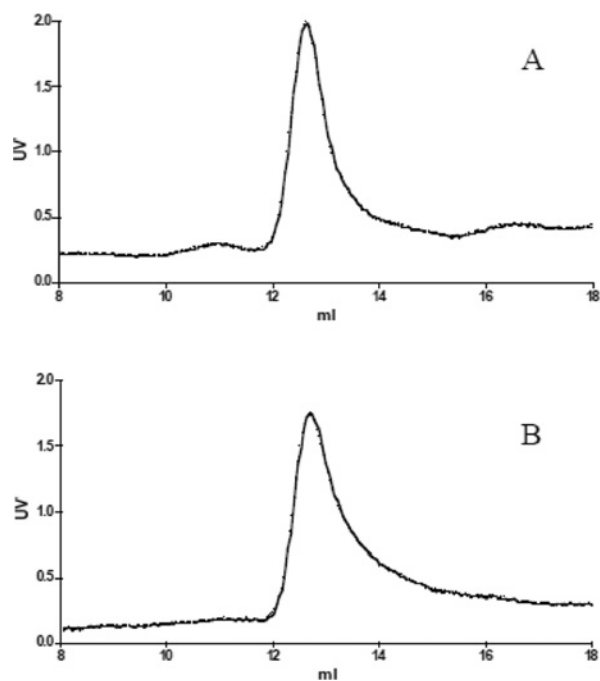

**Figure S1** Size-exclusion chromatography analysis

CK2 holoenzyme (40 pmols) was pre-incubated at 30°C for 15 min in 50 mM Tris/HCl, pH 7.5, containing 100 mM NaCl and 12 mM MgCl<sub>2</sub> in the absence (A) or presence (B) of 4000 pmols of CFTR  $\Delta$ F508 peptide. After the incubation, samples were loaded on Superdex 200 10/300 GL in AKTA purifier system (GE, Pharmacia). Runs were performed in 50 mM Tris/HCl, pH 7.5, 7 mM 2-mercaptoethanol and 0.5 M NaCl.

|                                                                                                                                                                     |                         |
|---------------------------------------------------------------------------------------------------------------------------------------------------------------------|-------------------------|
| GT <u>IK</u> <b>EN</b> <u>I</u> I--G <u>V</u> <u>S</u> <u>Y</u> <b>DE</b> <u>Y</u> <u>R</u> <u>Y</u> <u>R</u>                                                       | CFTR $\Delta$ F 500-518 |
| K <u>V</u> <u>F</u> <u>L</u> <u>E</u> <b>NV</b> <u>I</u> <u>R</u> <u>D</u> <u>A</u> <u>V</u> <u>T</u> <u>Y</u> <b>TE</b> <u>H</u> <u>A</u> <u>K</u> <u>R</u>        | Histone H4              |
| A <u>T</u> <u>P</u> <u>V</u> <u>K</u> <u>K</u> <u>A</u> <u>K</u> <u>K</u> <u>L</u> <u>A</u> <u>A</u> <u>T</u> <u>P</u> <u>K</u> <u>K</u> <u>A</u> <u>K</u> <u>K</u> | Histone H1              |

**Figure S2** Sequence alignment of CFTR $\Delta$ F508(500–518) peptide with histones H1 and H4

Alignment was performed by using MOE (Molecular Operating Environment) alignment tools (<http://www.chemcomp.com/software.htm>). Identical residues are reported in bold and denoted by asterisks. Conservative substitutions are underlined.

Received 27 May 2009/18 November 2009; accepted 19 November 2009

Published as BJ Immediate Publication 19 November 2009, doi:10.1042/BJ20090813

<sup>1</sup> To whom correspondence should be addressed (email [lorenzo.pinna@unipd.it](mailto:lorenzo.pinna@unipd.it)).
